# Supplementary material for: Molecular Characterization of Patients with Cryptorchidism: Preliminary Search for an Expression Profile Related to That of Testicular Germ-Cell Tumors
Source: MDPI journal article supplement (doi:10.3390/diagnostics13183020), 2023-09-21
Supplement: s1 [file s1]

### A) microRNA probes

| miRNA           | ID     | Sequence from 5' to 3'                                       |
|-----------------|--------|--------------------------------------------------------------|
| hsa-miR-371a-3p | 002124 | AAGUGCCGCCAUCUUUUGAGUGU                                      |
| hsa-miR-372-3p  | 000560 | AAAGUGCUGCGACAUUUGAGCGU                                      |
| hsa-miR-373-3p  | 000561 | GAAGUGCUUCGAUUUUGGGGUGU                                      |
| hsa-miR-367-3p  | 000555 | AAUUGCACUUUAGCAAUGGUGA                                       |
| RNU6B           | 001093 | CGCAAGGATGACACGCAAATTCGTGAAGCGTCCATATTTT                     |
| RNU44           | 001094 | CCTGGATGATAGTAAATGCTGACTGAACATGAAGGCTT<br>AATTAGCTCTAACTGACT |

### B) mRNA probes

| Gen          | ID             | Amplicon length |
|--------------|----------------|-----------------|
| <i>PTEN</i>  | Hs008229813_s1 | 154             |
| <i>LATS2</i> | Hs1059009_m1   | 68              |
| <i>IGF1R</i> | Hs01075031_s1  | 98              |
| <i>GAPDH</i> | Hs04420566_g1  | 120             |

### C) RT-PCR Conditions

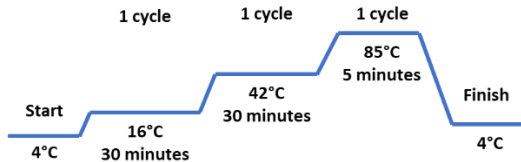

### D) qPCR Conditions

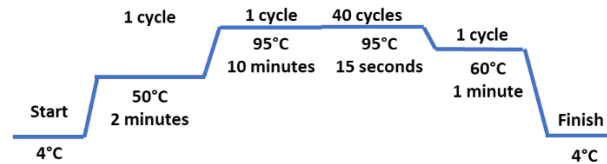

**Supplementary Figure 1. RT-qPCR conditions.** General conditions of RT-qPCR assays. **A)** microRNA probes evaluated in our study. **B)** mRNA probes evaluated in our study. **C)** RT-PCR conditions used in our study. **D)** qPCR conditions used in our study.
